# Supplementary material
Source: publisher figshare collection journal article supplement (https://aacr.figshare.com/articles/dataset/_/22422081)

## Supplementary Figure 1

Immunohistochemistry of tumor sections from the LMC for VDR expression.

A) Representative image of strong VDR expression in primary melanoma demonstrating cytoplasmic and occasional nuclear-localised immuno-staining (purple chromagen, 10x magnification). In association with the tumor, strong VDR staining is apparent in the epidermis, most commonly seen in the nuclei of keratinocytes which was used as an intra slide positive control (see Image C). Tumor associated stroma demonstrates much weaker VDR expression.

B) Representative image of strong VDR expression in a primary tumor, both cytoplasmic and nuclear in localisation, and in contrast weak cytoplasmic to absent VDR expression in the surrounding stroma (20x magnification). Lymphocytes demonstrate weak cytoplasmic to absent VDR expression whilst a small proportion display nuclear immuno-labeling.

C) Representative image of weak VDR expression in primary melanoma, in association with weak to absent stromal expression of VDR (20x magnification). In contrast, strong nuclear VDR staining is apparent in the root sheath keratinocytes of the hair follicle.

Review and photographs courtesy of Professor Ken MacLennan, Department of Histopathology, Leeds Teaching Hospital Trust

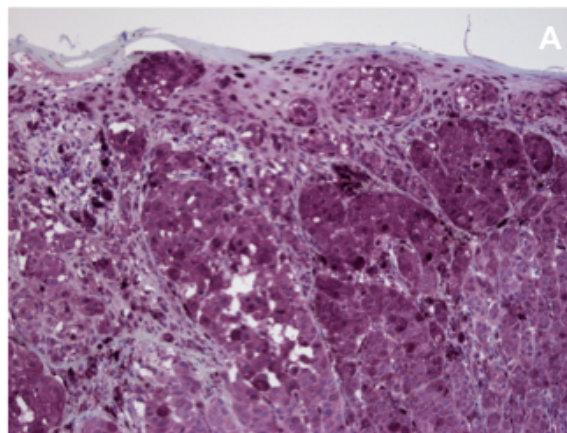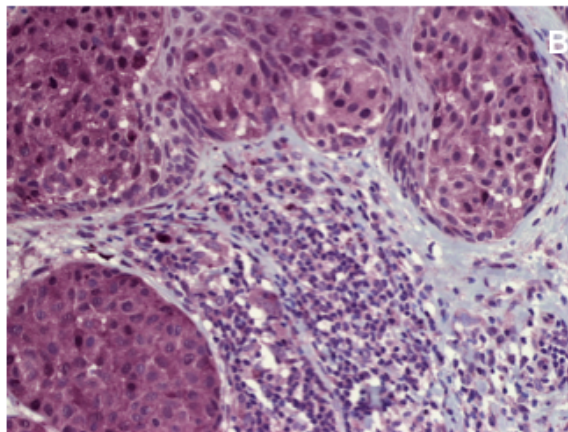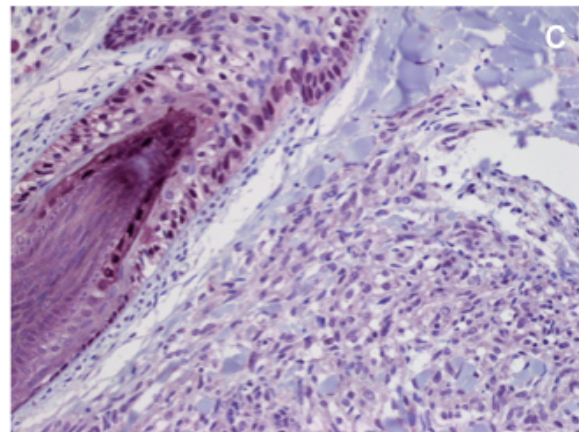

Supplement: Supplementary file 1 [file 39868314]
